# Supplementary material for: Manganese–cerium mixed oxides supported on rice husk based activated carbon with high sulfur tolerance for low-temperature selective catalytic reduction of nitrogen oxides with ammonia
Source: Royal Society of Chemistry journal article supplement (doi:10.1039/c9ra03937f), 2019-01-01
Supplement: c9ra03937f1.pdf [file c9ra03937f1.pdf]

Supporting Information

**Manganese-cerium mixed oxides supported on rice husk  
based activated carbon with high sulfur tolerance for low-  
temperature selective catalytic reduction of nitrogen oxides  
with ammonia**

Yun Shu\*, Fan Zhang, Hongchang Wang

State Key Laboratory of Environmental Criteria and Risk Assessment, Chinese Research

Academy of Environmental Sciences, Beijing 100012, China

\*Corresponding author. Tel.: +86 10 84934516; Fax: +86 10 84934516.

E-mail address: [shuyun@craes.org.cn](mailto:shuyun@craes.org.cn) (Y. Shu).

## Content

Table S1 Characteristics of raw biomasses

Figure S1. Raman spectra of different samples

Figure S2. Si 2p XPS spectra of Mn-Ce/RAC and Mn-Ce/SAC catalysts

Figure S3. FT-IR spectra of Mn-Ce/RAC and Mn-Ce/SAC catalysts before and after pretreatment with a flow of 800 ppm NO-800 ppm NH<sub>3</sub>-3% O<sub>2</sub>-300 ppm SO<sub>2</sub>-10 vol.% H<sub>2</sub>O

Fourier transform infrared spectroscopy (FT-IR) of the catalyst pretreated with a flow of NO-NH<sub>3</sub>-O<sub>2</sub>-SO<sub>2</sub>-H<sub>2</sub>O was performed to offer further evidence for the identification of sulfate species formed on the catalyst surface. Figure S3 shows the FT-IR spectra of fresh and pretreated catalysts. For fresh catalysts, the C-O groups at 1048 cm<sup>-1</sup> and C-H transformative vibrational groups at 1470 cm<sup>-1</sup> were observed [1,2]. According to the reported literature [3], the peak at 880 cm<sup>-1</sup> indicated that aromatic C-H outside distortion occurred for the catalysts. After the pretreatment with a flow of NO-NH<sub>3</sub>-O<sub>2</sub>-SO<sub>2</sub>-H<sub>2</sub>O, Mn-Ce/RAC-P and Mn-Ce/SAC-P catalysts showed a new absorption at 1400 cm<sup>-1</sup>, indicating the presence of NH<sub>4</sub><sup>+</sup> species, which were chemisorbed on the Brønsted acid sites [4]. Meanwhile, another new absorption appeared at 1150 cm<sup>-1</sup> for the both pretreated catalysts, which might be assigned to the characteristic frequencies of the SO<sub>4</sub><sup>2-</sup> ion [5]. Furthermore, for the Mn-Ce/RAC-P catalyst, the absorption intensities at 1150 and 1400 cm<sup>-1</sup> were lower than those of the Mn-Ce/SAC-P catalyst. These results demonstrated that during the pretreatment, there

was little ammonium-sulfate salts deposited on the surface of the Mn-Ce/RAC-P catalyst compared to that of the Mn-Ce/SAC-P catalyst.

Table S1 Characteristics of raw biomasses

| samples                                | rice husk |
|----------------------------------------|-----------|
| proximate analysis (wt%, as air dried) |           |
| moisture                               | 4.01      |
| ash                                    | 15.48     |
| volatile matter                        | 64.43     |
| fixed carbon                           | 16.08     |
| ultimate analysis (wt%, as air dried)  |           |
| C                                      | 39.47     |
| H                                      | 4.85      |
| O                                      | 35.02     |
| N                                      | 0.48      |
| S                                      | 0.04      |
| LHV (MJ/kg)                            | 15.06     |

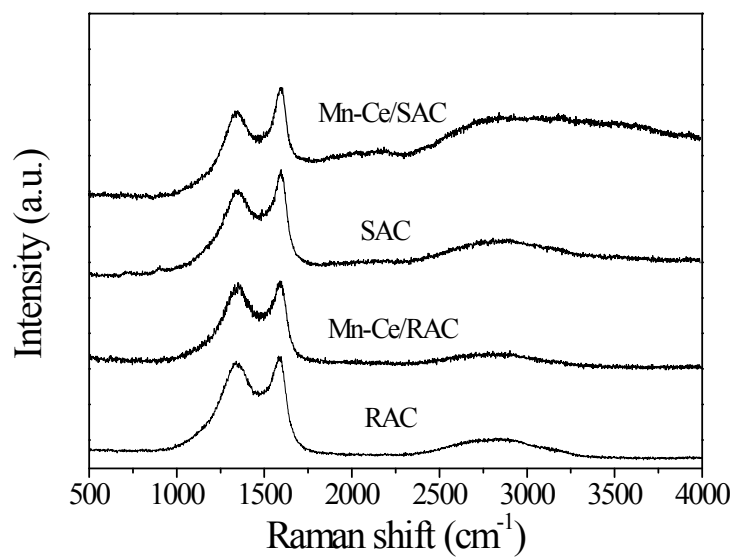

Figure S1 Raman spectra of different samples

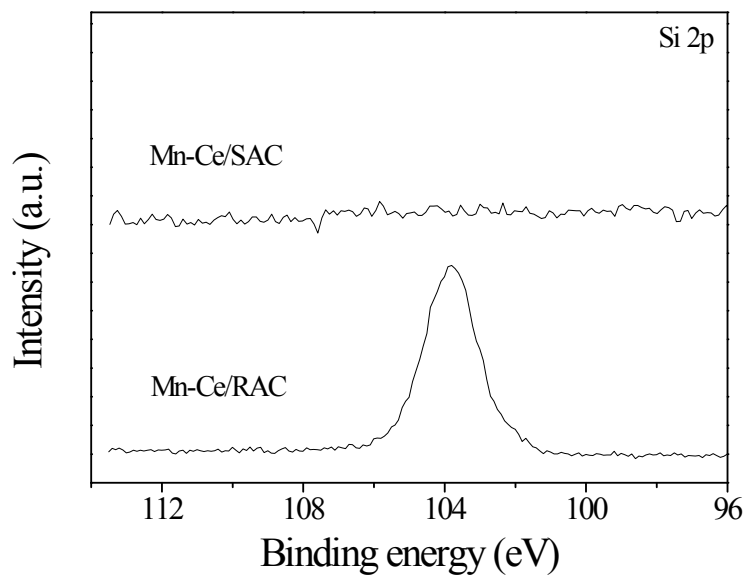

Figure S2 Si 2p XPS spectra of Mn-Ce/RAC and Mn-Ce/SAC catalysts

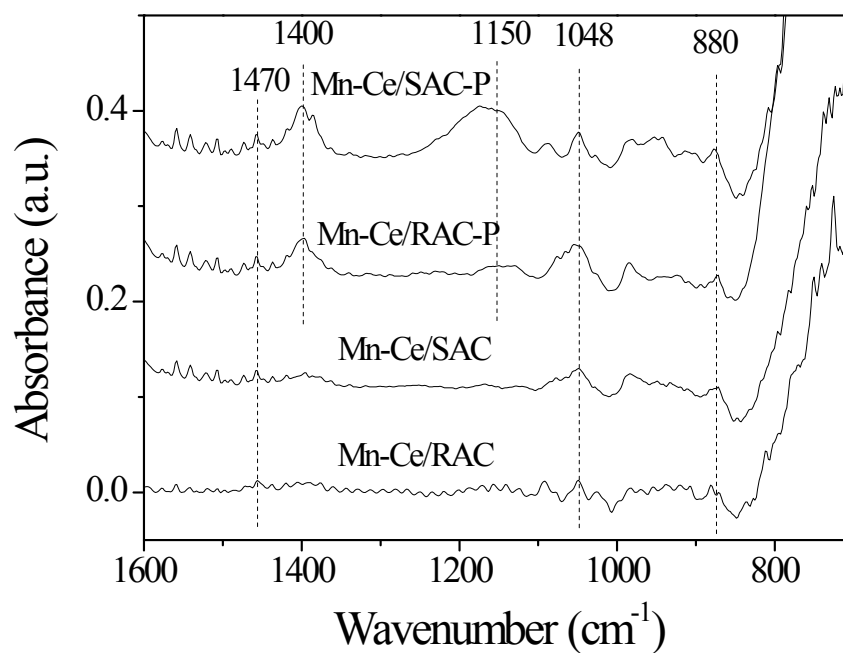

Figure S3 FT-IR spectra of Mn-Ce/RAC and Mn-Ce/SAC catalysts before and after pretreatment with a flow of 800 ppm NO-800 ppm NH<sub>3</sub>-3% O<sub>2</sub>-300 ppm SO<sub>2</sub>-10 vol.% H<sub>2</sub>O

### References

- 1 Li W, Tan S, Shi Y, Li S. *Fuel*, 2015, **160**, 35-42.
- 2 Lu P, Li R, Xing Y, et al. *Fuel*, 2018, **233**, 188-199.
- 3 Li P, Liu Q, Liu Z. *Chem. Eng. J.*, 2012, **181**, 169-173.
- 4 Topsøe, N. Y. *Science*, 1994, **265**, 1217-1219.
- 5 Takagi, M.; Kawai, T.; Soma, M.; Onishi, T.; Tamaru, K. *J. Phys. Chem.*, 1976, **80**, 430-431.
